# Supplementary material
Source: PubMed Central journal article supplement (PMC4136027)
Supplement: AAC.02468-14_zac008143084so1.pdf [file AAC.02468-14_zac008143084so1.pdf]

**A.**

*S. aureus* SAMMC700  
MRSA-Wound Isolate

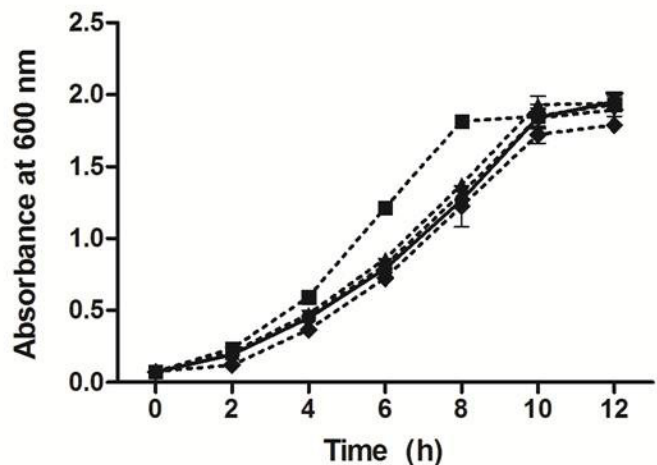**B.**

*P. aeruginosa* SAMMC604  
MDR-Wound Isolate

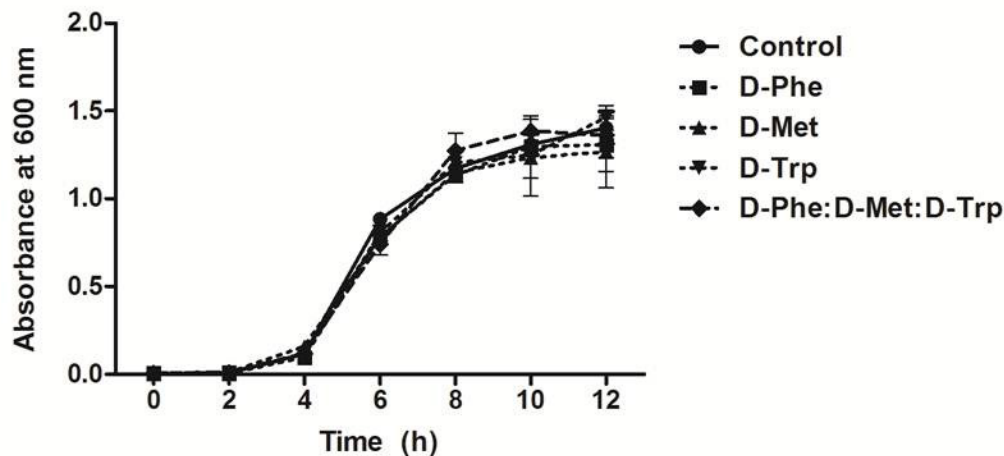**C.**

*S. aureus* SAMMC700  
MRSA-Wound Isolate

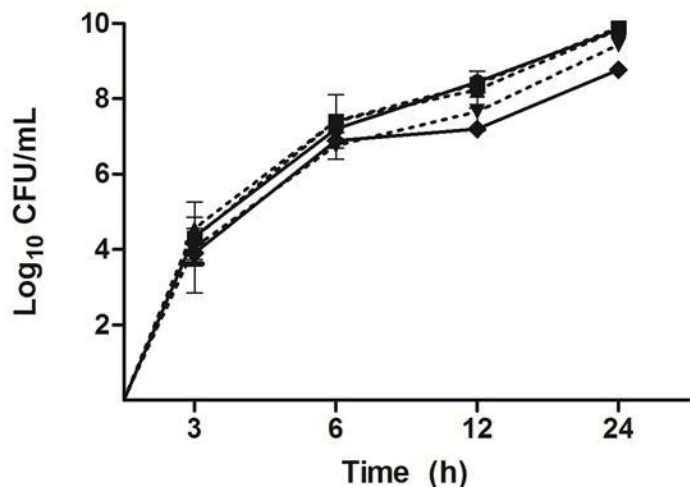**D.**

*P. aeruginosa* SAMMC604  
MDR-Wound Isolate

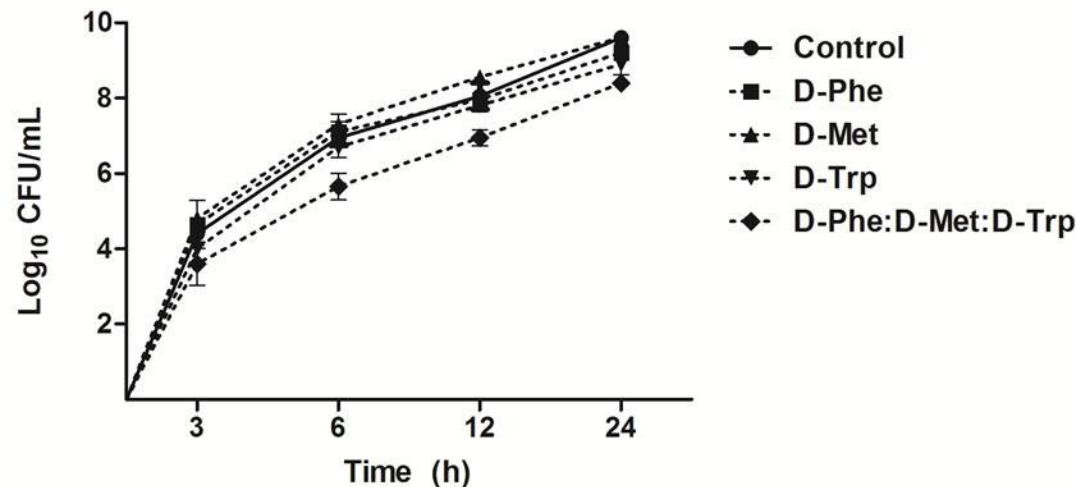

**Supplemental Figure 1. D-AAs at effective concentrations do not inhibit cell growth. A-B)** Overnight cultures of a representative strain of *S. aureus* (SAMMC700) and *P. aeruginosa* (SAMMC604) were inoculated into 25mL of MHB-II and grown at 37°C with agitation in the presence or absence of individual D-AAs (D-Phe, D-Met, and D-Trp) at 5 mM or as an equimolar mixture D-Phe:D-Met:D-Trp. Absorbance at 600 nm was measured every 2 hours up to 12 hours post-inoculation as an indication of bacterial growth. **C-D)** Bacterial growth of *S. aureus* (SAMMC700) and *P. aeruginosa* (SAMMC604) in the presence or absence of D-AAs, as measured by Log<sub>10</sub> CFU for up to 24 hours.
